# Supplementary material
Source: PubMed Central journal article supplement (PMC4542077)
Supplement: NIHMS714698-supplement-supplemental_data.pdf [file NIHMS714698-supplement-supplemental_data.pdf]

**S Table 1: Description of the BCAC studies**

| Abbreviation | Study                                                                | Country   | Case ascertainment                           | Breast cancer case definition                                                                                                                                                                                                                                                                                                                                                                                                                                                                                                                                                                                                                                     | Age    | Ref     |
|--------------|----------------------------------------------------------------------|-----------|----------------------------------------------|-------------------------------------------------------------------------------------------------------------------------------------------------------------------------------------------------------------------------------------------------------------------------------------------------------------------------------------------------------------------------------------------------------------------------------------------------------------------------------------------------------------------------------------------------------------------------------------------------------------------------------------------------------------------|--------|---------|
| ABCFS        | Australian Breast Cancer Family Study                                | Australia | Population-based case-control study          | All cases diagnosed < age 40 plus a random sample of those diagnosed ages 40-59 from cancer registries in Victoria and New South Wales, plus a limited number diagnosed aged 60-69; cases living in Melbourne recruited from 1992-99 and in Sydney from 1993-98.                                                                                                                                                                                                                                                                                                                                                                                                  | 23-69  | (1)     |
| BREOGAN      | Breast Oncology Galicia Network                                      | Spain     | Population-based case-control                | A population-based study conducted since 2004 in two cities in Galicia, Spain (Vigo and Santiago) covering approx. 700,000 inhabitants. The study currently includes 1000 breast cancer cases with blood plus risk factor questionnaire.                                                                                                                                                                                                                                                                                                                                                                                                                          | 20-85  | (2;3)   |
| CGPS         | Copenhagen General Population Study                                  | Denmark   | Population-based                             | Consecutive, incident cases from 1 hospital with centralized care for a population of 400,000 women from 2001 to the present.                                                                                                                                                                                                                                                                                                                                                                                                                                                                                                                                     | 26-100 | (4;5)   |
| GESBC        | Genetic Epidemiology Study of Breast Cancer by Age 50                | Germany   | Population-based study of women <50 years    | All incident cases diagnosed <50 years of age in 1992-5 in two regions: Rhein-Neckar-Odenwald and Freiburg, by surveying the 38 clinics serving these regions                                                                                                                                                                                                                                                                                                                                                                                                                                                                                                     | 24-50  | (6)     |
| HEBCS        | Helsinki Breast Cancer Study                                         | Finland   | Hospital-based                               | (1) Consecutive cases (883) from the Department of Oncology, Helsinki University Central Hospital 1997-8 and 2000, (2) Consecutive cases (986) from the Department of Surgery, Helsinki University Central Hospital 2001 – 2004, (3) Familial breast cancer patients (536) from the Helsinki University Central Hospital, Departments of Oncology and Clinical Genetics (1995-)                                                                                                                                                                                                                                                                                   | 22-96  | (7-9)   |
| HERPACC      | Hospital-based Epidemiologic Research Program at Aichi Cancer Center | Japan     | Hospital-based case-controls study           | Incident breast cancer cases who firstly visited Aichi Cancer Center between 2001 and 2005 and were diagnosed within 1 year from the first visit. No previous history of any type of cancer.                                                                                                                                                                                                                                                                                                                                                                                                                                                                      | 23-79  | (10)    |
| NC-BCFR      | Northern California Breast Cancer Family Registry                    | USA       | Population-based familial case-control study | Cases included those enrolled in the NC-BCFR as part of Phase I and II recruitment. Incident cases aged <65 years diagnosed between 1995 and 2003 were identified through the SEER cancer registry of the Greater San Francisco Bay Area. All cases likely at increased genetic risk were eligible to enroll in the BCFR (dx at age <35 yrs, personal history of ovarian or childhood cancer, bilateral breast cancer with 1st dx at age <50, family history of breast or ovarian cancer in first-degree relatives). Cases not meeting these criteria were randomly sampled (2.5% of whites, 30% of African Americans, 28% of Hispanics, 38% of Asian Americans). | 22-64  | (11)    |
| PBCS         | NCI Polish Breast Cancer Study                                       | Poland    | Population-based                             | Incident cases from 2000-3 identified through a rapid identification system in participating hospitals covering ~ 90% of all eligible cases; periodic check against the cancer registries in Warsaw and Łódź to assure complete identification of cases                                                                                                                                                                                                                                                                                                                                                                                                           | 27-75  | (12)    |
| UCIBCS       | UCI Breast Cancer Study                                              | USA       | Population-based case-control study          | All cases diagnosed in Orange County, California, during one-year period beginning March 1, 1994. Ascertained through the population-based Cancer Surveillance Program of Orange County California (CSPOC)                                                                                                                                                                                                                                                                                                                                                                                                                                                        | 24-90  | (13;14) |

**S Table 2: Characteristics of the SEARCH study by post-diagnosis alcohol consumption**

| Characteristic       | Alcohol consumption (units/week) |    |       |    |         |    |       |    | Total | %  | P value* |
|----------------------|----------------------------------|----|-------|----|---------|----|-------|----|-------|----|----------|
|                      | Non-<br>drinkers                 | %  | <=7   | %  | >7-<=14 | %  | >14   | %  |       |    |          |
| N                    | 2,329                            | 28 | 3,996 | 47 | 1,454   | 17 | 667   | 8  | 8,446 |    |          |
| Age                  |                                  |    |       |    |         |    |       |    |       |    |          |
| Mean                 | 45                               |    | 53    |    | 53      |    | 53    |    | 54    |    | <0.0001  |
| Range                | 23-71                            |    | 23-73 |    | 25-69   |    | 30-69 |    | 23-73 |    |          |
| Menopausal status    |                                  |    |       |    |         |    |       |    |       |    | <0.0001  |
| Premenopausal        | 350                              | 15 | 691   | 17 | 233     | 16 | 114   | 17 | 1,388 | 16 |          |
| Perimenopausal       | 833                              | 36 | 1,529 | 38 | 627     | 43 | 296   | 44 | 3,285 | 39 |          |
| Postmenopausal       | 1,146                            | 49 | 1,776 | 44 | 594     | 41 | 257   | 39 | 3,773 | 45 |          |
| Stage                |                                  |    |       |    |         |    |       |    |       |    | <0.0001  |
| I                    | 987                              | 48 | 1,744 | 49 | 692     | 52 | 326   | 55 | 3,749 | 50 |          |
| II                   | 954                              | 46 | 1,637 | 46 | 575     | 44 | 241   | 41 | 3,407 | 45 |          |
| III                  | 82                               | 4  | 140   | 4  | 45      | 3  | 22    | 4  | 289   | 4  |          |
| IV                   | 34                               | 2  | 39    | 1  | 8       | 1  | 3     | 1  | 84    | 1  |          |
| Missing              | 272                              | 12 | 436   | 11 | 134     | 9  | 75    | 11 | 917   | 11 |          |
| Grade                |                                  |    |       |    |         |    |       |    |       |    | 0.07     |
| I                    | 397                              | 21 | 689   | 21 | 300     | 24 | 129   | 24 | 1,515 | 22 |          |
| II                   | 939                              | 50 | 1,618 | 49 | 587     | 47 | 269   | 50 | 3,413 | 49 |          |
| III                  | 548                              | 29 | 1,003 | 30 | 352     | 28 | 143   | 26 | 2,046 | 29 |          |
| Missing              | 445                              | 19 | 686   | 17 | 215     | 15 | 126   | 19 | 1,472 | 17 |          |
| BMI                  |                                  |    |       |    |         |    |       |    |       |    | <0.0001  |
| <=22.7               | 425                              | 19 | 903   | 23 | 354     | 25 | 187   | 29 | 1,869 | 23 |          |
| 22.8-25.2            | 459                              | 20 | 1,047 | 27 | 417     | 29 | 187   | 29 | 2,110 | 25 |          |
| 25.3-28.4            | 532                              | 23 | 970   | 25 | 371     | 26 | 164   | 25 | 2,037 | 25 |          |
| 28.5+                | 849                              | 37 | 1,006 | 26 | 289     | 20 | 118   | 18 | 2,262 | 27 |          |
| Missing              | 64                               | 3  | 70    | 2  | 23      | 2  | 11    | 2  | 168   | 2  |          |
| ER status            |                                  |    |       |    |         |    |       |    |       |    | 0.03     |
| Negative             | 321                              | 20 | 529   | 19 | 187     | 18 | 74    | 16 | 1,111 | 19 |          |
| Positive             | 1,273                            | 80 | 2,300 | 81 | 861     | 82 | 396   | 84 | 4,830 | 81 |          |
| Missing              | 735                              | 32 | 1,167 | 29 | 406     | 28 | 197   | 30 | 2,505 | 30 |          |
| Smoking              |                                  |    |       |    |         |    |       |    |       |    | <0.0001  |
| Non-smoker           | 1,289                            | 55 | 2,333 | 58 | 636     | 44 | 212   | 32 | 4,470 | 53 |          |
| Former smoker        | 637                              | 27 | 1,153 | 29 | 569     | 39 | 286   | 43 | 2,645 | 31 |          |
| Current smoker       | 400                              | 17 | 506   | 13 | 248     | 17 | 168   | 25 | 1,322 | 16 |          |
| Missing              | 3                                | 0  | 4     | 0  | 1       | 0  | 1     | 0  | 9     | 0  |          |
| Socioeconomic status |                                  |    |       |    |         |    |       |    |       |    | <0.0001  |
| 1 (least deprived)   | 389                              | 17 | 838   | 21 | 329     | 23 | 130   | 20 | 1,686 | 20 |          |
| 2                    | 404                              | 17 | 841   | 21 | 317     | 22 | 124   | 19 | 1,686 | 20 |          |
| 3                    | 443                              | 19 | 794   | 20 | 299     | 21 | 147   | 22 | 1,683 | 20 |          |
| 4                    | 494                              | 21 | 766   | 19 | 282     | 19 | 145   | 22 | 1,687 | 20 |          |
| 5                    | 596                              | 26 | 745   | 19 | 224     | 15 | 118   | 18 | 1,683 | 20 |          |
| Missing              | 3                                | 0  | 12    | 0  | 3       | 0  | 3     | 0  | 21    | 0  |          |

\*From ordinal logistic regression

**S Table 3: Characteristics of the EPIC study by pre-diagnosis alcohol consumption**

| Characteristic       | Alcohol consumption (units/week) |    |       |    |         |    |       |    |        |     | P value* |
|----------------------|----------------------------------|----|-------|----|---------|----|-------|----|--------|-----|----------|
|                      | Non-drinkers                     | %  | <=7   | %  | >7-<=14 | %  | >14   | %  | Total  | %   |          |
| N                    | 1,492                            | 14 | 5,088 | 48 | 1,949   | 19 | 2,032 | 19 | 10,561 | 100 |          |
| Age                  |                                  |    |       |    |         |    |       |    |        |     | 0.12     |
| Mean                 | 60                               |    | 59    |    | 60      |    | 60    |    | 60     |     |          |
| Range                | 31-85                            |    | 25-93 |    | 28-92   |    | 28-88 |    | 25-93  |     |          |
| Menopausal status    |                                  |    |       |    |         |    |       |    |        |     |          |
| Premenopausal        | 53                               | 4  | 195   | 4  | 67      | 3  | 43    | 2  | 358    | 3   | <0.0001  |
| Perimenopausal       | 399                              | 27 | 1,432 | 28 | 498     | 26 | 503   | 25 | 2,832  | 27  |          |
| Postmenopausal       | 1,040                            | 70 | 3,461 | 68 | 1384    | 71 | 1,486 | 73 | 7,371  | 70  |          |
| Stage                |                                  |    |       |    |         |    |       |    |        |     | 0.45     |
| I                    | 668                              | 55 | 2,109 | 55 | 812     | 56 | 914   | 55 | 4,503  | 55  |          |
| II                   | 414                              | 34 | 1,423 | 37 | 497     | 35 | 604   | 36 | 2,938  | 36  |          |
| III                  | 110                              | 9  | 253   | 7  | 99      | 7  | 120   | 7  | 582    | 7   |          |
| IV                   | 24                               | 2  | 71    | 2  | 30      | 2  | 29    | 2  | 154    | 2   |          |
| Missing              | 276                              | 19 | 1,232 | 24 | 511     | 26 | 365   | 18 | 2,384  | 23  |          |
| Grade                |                                  |    |       |    |         |    |       |    |        |     | 0.02     |
| I                    | 176                              | 19 | 494   | 19 | 186     | 20 | 170   | 17 | 1,026  | 19  |          |
| II                   | 407                              | 45 | 1,158 | 45 | 372     | 41 | 418   | 42 | 2,355  | 44  |          |
| III                  | 322                              | 36 | 935   | 36 | 351     | 39 | 404   | 41 | 2,012  | 37  |          |
| Missing              | 587                              | 39 | 2,501 | 49 | 1040    | 53 | 1,040 | 51 | 5,168  | 49  |          |
| BMI                  |                                  |    |       |    |         |    |       |    |        |     | <0.0001  |
| <=22.7               | 404                              | 27 | 1,717 | 34 | 744     | 38 | 795   | 39 | 3,660  | 35  |          |
| 22.8-25.2            | 342                              | 23 | 1,359 | 27 | 539     | 28 | 570   | 28 | 2,810  | 27  |          |
| 25.3-28.4            | 350                              | 23 | 1,057 | 21 | 397     | 20 | 424   | 21 | 2,228  | 21  |          |
| 28.5+                | 396                              | 27 | 955   | 19 | 269     | 14 | 243   | 12 | 1,863  | 18  |          |
| ER status            |                                  |    |       |    |         |    |       |    |        |     | 0.34     |
| Negative             | 175                              | 18 | 739   | 22 | 240     | 18 | 281   | 19 | 1,435  | 20  |          |
| Positive             | 807                              | 82 | 2,674 | 78 | 1066    | 82 | 1,206 | 81 | 5,753  | 80  |          |
| Missing              | 510                              | 34 | 1,675 | 33 | 643     | 33 | 545   | 27 | 3,373  | 32  |          |
| Smoking status       |                                  |    |       |    |         |    |       |    |        |     | <0.0001  |
| Non-smoker           | 945                              | 65 | 2,872 | 58 | 1015    | 53 | 859   | 43 | 5,691  | 55  |          |
| Former smoker        | 253                              | 17 | 1,219 | 25 | 508     | 27 | 587   | 30 | 2,567  | 25  |          |
| Current smoker       | 254                              | 17 | 860   | 17 | 378     | 20 | 530   | 27 | 2,022  | 20  |          |
| Missing              | 40                               | 3  | 137   | 3  | 48      | 2  | 56    | 3  | 281    | 3   |          |
| Socioeconomic status |                                  |    |       |    |         |    |       |    |        |     | <0.0001  |
| 1 (most educated)    | 215                              | 15 | 1,088 | 23 | 525     | 28 | 642   | 33 | 2,470  | 24  |          |
| 2                    | 334                              | 23 | 1,226 | 26 | 490     | 26 | 538   | 27 | 2,588  | 26  |          |
| 3                    | 249                              | 17 | 1,209 | 25 | 455     | 24 | 407   | 21 | 2,320  | 23  |          |
| 4                    | 527                              | 36 | 1,177 | 25 | 393     | 21 | 350   | 18 | 2,447  | 24  |          |
| 5                    | 120                              | 8  | 94    | 2  | 23      | 1  | 32    | 2  | 269    | 3   |          |
| Missing              | 47                               | 3  | 294   | 6  | 63      | 3  | 63    | 3  | 467    | 4   |          |

\*From ordinal logistic regression

**S Table 4: Distribution of alcohol consumption by country in the EPIC cohort**

| Country     | Non-drinkers | %  | <=7   | %  | >7-<=14 | %  | >14   | %  | Total  |
|-------------|--------------|----|-------|----|---------|----|-------|----|--------|
| Denmark     | 30           | 2  | 510   | 39 | 328     | 25 | 438   | 34 | 1,306  |
| France      | 346          | 13 | 1,150 | 42 | 551     | 20 | 698   | 25 | 2,745  |
| Germany     | 36           | 5  | 433   | 55 | 145     | 19 | 168   | 21 | 782    |
| Greece      | 61           | 32 | 106   | 55 | 14      | 7  | 12    | 6  | 193    |
| Italy       | 216          | 22 | 378   | 39 | 188     | 19 | 195   | 20 | 977    |
| Netherlands | 145          | 17 | 362   | 43 | 145     | 17 | 195   | 23 | 847    |
| Norway      | 178          | 20 | 617   | 70 | 85      | 10 | 3     | 0  | 883    |
| Spain       | 222          | 49 | 152   | 33 | 38      | 8  | 44    | 10 | 456    |
| Sweden      | 159          | 15 | 599   | 58 | 174     | 17 | 104   | 10 | 1,036  |
| UK          | 99           | 7  | 781   | 58 | 281     | 21 | 175   | 13 | 1,336  |
| Total       | 1,492        | 14 | 5,088 | 48 | 1,949   | 18 | 2,032 | 19 | 10,561 |

**S Table 5: Characteristics of the BCAC studies**

| Characteristic                 | ABCFS | BREOGAN | CGPS  | GESBC | HEBCS | HERPACC | NC-BCFR | PBCS  | UCIBCS | Total  |
|--------------------------------|-------|---------|-------|-------|-------|---------|---------|-------|--------|--------|
| N                              | 1,336 | 1,192   | 2,574 | 612   | 1,288 | 453     | 1,418   | 571   | 788    | 10,232 |
| Mortality                      |       |         |       |       |       |         |         |       |        |        |
| All-cause                      | 394   | 58      | 424   | 205   | 228   | 68      | 235     | 71    | 228    | 1,911  |
| Breast cancer                  | 321   | 0       | 24    | 153   | 116   | 31      | 103     | 22    | 90     | 860    |
| Alcohol intake<br>(units/week) |       |         |       |       |       |         |         |       |        |        |
| Non-drinkers                   | 692   | 568     | 588   | 158   | 110   | 299     | 852     | 2     | 184    | 3,453  |
| <=7                            | 228   | 145     | 798   | 270   | 1,167 | 94      | 390     | 451   | 385    | 3,928  |
| >7-<=14                        | 216   | 260     | 515   | 82    | 11    | 32      | 80      | 80    | 142    | 1,418  |
| 14+                            | 200   | 219     | 673   | 102   | 0     | 28      | 96      | 38    | 77     | 1,433  |
| Age (year)                     |       |         |       |       |       |         |         |       |        |        |
| Mean                           | 43    | 56      | 61    | 43    | 57    | 52      | 51      | 53    | 58     | 54     |
| Range                          | 23-69 | 28-88   | 24-93 | 20-51 | 25-95 | 23-78   | 21-78   | 27-75 | 18-90  | 18-95  |
| Menopausal status              |       |         |       |       |       |         |         |       |        |        |
| Premenopausal                  | 787   | 217     | 283   | 348   | 163   | 105     | 344     | 100   | 119    | 2,466  |
| Perimenopausal                 | 369   | 339     | 520   | 264   | 403   | 161     | 519     | 238   | 225    | 3,038  |
| Postmenopausal                 | 180   | 632     | 1,771 | 0     | 722   | 187     | 555     | 233   | 444    | 4,724  |
| ER status                      |       |         |       |       |       |         |         |       |        |        |
| Negative                       | 400   | 206     | 362   | 193   | 207   | 113     | 295     | 169   | 131    | 2,076  |
| Positive                       | 782   | 906     | 1,762 | 328   | 1,053 | 308     | 842     | 356   | 499    | 6,836  |
| Missing                        | 154   | 80      | 450   | 91    | 28    | 32      | 281     | 46    | 158    | 1,320  |
| Stage                          |       |         |       |       |       |         |         |       |        |        |
| I                              | 0     | 0       | 1,246 | 228   | 813   | 155     | 422     | 239   | 512    | 3,615  |
| II                             | 0     | 0       | 820   | 278   | 383   | 191     | 399     | 218   | 215    | 2,504  |
| III                            | 0     | 0       | 70    | 56    | 37    | 69      | 47      | 26    | 19     | 324    |
| IV                             | 0     | 0       | 0     | 20    | 39    | 20      | 19      | 6     | 14     | 118    |
| Missing                        | 1,336 | 1,192   | 438   | 30    | 16    | 18      | 531     | 82    | 28     | 3,671  |
| Grade                          |       |         |       |       |       |         |         |       |        |        |
| I                              | 0     | 195     | 565   | 37    | 352   | 43      | 209     | 126   | 104    | 1,631  |
| II                             | 0     | 543     | 1,008 | 276   | 563   | 108     | 491     | 262   | 296    | 3,547  |
| III                            | 0     | 293     | 398   | 224   | 342   | 57      | 438     | 122   | 232    | 2,106  |
| Missing                        | 1,336 | 161     | 603   | 75    | 31    | 245     | 280     | 61    | 156    | 2,948  |

**S Table 6: Association of alcohol consumption and mortality**

| Study  | Drinking category (units/week) | Uni-variate         |        |      |      |      |                                  |      |      |      | Multi-variate*      |      |      |      |                                  |      |      |      |
|--------|--------------------------------|---------------------|--------|------|------|------|----------------------------------|------|------|------|---------------------|------|------|------|----------------------------------|------|------|------|
|        |                                | All-cause mortality |        |      |      |      | Breast cancer specific mortality |      |      |      | All-cause mortality |      |      |      | Breast cancer specific mortality |      |      |      |
|        |                                | N                   | Events | HR   | LCL  | UCL  | Events                           | HR   | LCL  | UCL  | Events              | HR   | LCL  | UCL  | Events                           | HR   | LCL  | UCL  |
| SEARCH | Linear estimates               | 8,446               | 1,506  | 0.88 | 0.83 | 0.93 | 1,213                            | 0.90 | 0.84 | 0.96 | 945                 | 0.90 | 0.83 | 0.98 | 765                              | 0.93 | 0.85 | 1.01 |
|        | 0                              | 2,329               | 456    |      |      |      | 353                              |      |      |      | 277                 |      |      |      | 212                              |      |      |      |
|        | <=7                            | 3,996               | 726    | 0.89 | 0.80 | 1.01 | 596                              | 0.94 | 0.83 | 1.08 | 469                 | 0.95 | 0.82 | 1.11 | 394                              | 1.04 | 0.88 | 1.23 |
|        | >7-<=14                        | 1,454               | 221    | 0.71 | 0.61 | 0.84 | 177                              | 0.74 | 0.61 | 0.88 | 139                 | 0.78 | 0.63 | 0.96 | 109                              | 0.81 | 0.64 | 1.03 |
|        | >14                            | 667                 | 103    | 0.74 | 0.60 | 0.92 | 87                               | 0.81 | 0.64 | 1.02 | 60                  | 0.77 | 0.58 | 1.03 | 50                               | 0.86 | 0.63 | 1.18 |
| EPIC   | Linear estimates               | 10,561              | 1,422  | 0.94 | 0.89 | 1.00 | 749                              | 0.91 | 0.84 | 0.99 | 395                 | 0.98 | 0.88 | 1.09 | 174                              | 1.06 | 0.90 | 1.24 |
|        | 0                              | 1,492               | 227    |      |      |      | 132                              |      |      |      | 68                  |      |      |      | 35                               |      |      |      |
|        | <=7                            | 5,088               | 694    | 0.84 | 0.72 | 0.98 | 371                              | 0.80 | 0.65 | 0.99 | 187                 | 0.99 | 0.74 | 1.33 | 82                               | 1.03 | 0.67 | 1.58 |
|        | >7-<=14                        | 1,949               | 229    | 0.71 | 0.59 | 0.86 | 111                              | 0.63 | 0.48 | 0.82 | 58                  | 0.88 | 0.61 | 1.26 | 23                               | 0.95 | 0.55 | 1.64 |
|        | >14                            | 2,032               | 272    | 0.84 | 0.69 | 1.01 | 135                              | 0.78 | 0.60 | 1.00 | 82                  | 0.97 | 0.69 | 1.37 | 34                               | 1.23 | 0.74 | 2.03 |
| BCAC   | Linear estimates               | 10,232              | 1,911  | 0.91 | 0.87 | 0.96 | 860                              | 0.95 | 0.89 | 1.02 | 963                 | 0.88 | 0.82 | 0.95 | 355                              | 0.94 | 0.83 | 1.07 |
|        | 0                              | 3,453               | 726    |      |      |      | 352                              |      |      |      | 303                 |      |      |      | 108                              |      |      |      |
|        | <=7                            | 3,928               | 680    | 0.71 | 0.63 | 0.80 | 307                              | 0.79 | 0.66 | 0.94 | 434                 | 0.62 | 0.53 | 0.73 | 181                              | 0.67 | 0.51 | 0.88 |
|        | >7-<=14                        | 1,418               | 259    | 0.83 | 0.71 | 0.96 | 104                              | 0.89 | 0.71 | 1.11 | 112                 | 0.73 | 0.59 | 0.92 | 32                               | 0.91 | 0.61 | 1.36 |
|        | >14                            | 1,433               | 246    | 0.76 | 0.65 | 0.88 | 97                               | 0.87 | 0.69 | 1.10 | 114                 | 0.70 | 0.56 | 0.87 | 34                               | 0.85 | 0.57 | 1.27 |

\* Both EPIC and SEARCH were adjusted for stage, grade, ER status, BMI, smoking status, SES and menopausal status (EPIC estimates were also adjusted for country). BCAC adjusted for stage, grade, ER status, menopausal status and study.

**S Table 7: Association of alcohol consumption and mortality in patients with stage I and II tumours compared to all patients in SEARCH**

|           | Drinking Category | N     | All-cause |      |      |      | BCSS   |      |      |      | All-cause |      |      |      | BCSS   |      |      |      |
|-----------|-------------------|-------|-----------|------|------|------|--------|------|------|------|-----------|------|------|------|--------|------|------|------|
|           |                   |       | Events    | HR   | LCL  | UCL  | Events | HR   | LCL  | UCL  | Events    | HR   | LCL  | UCL  | Events | HR   | LCL  | UCL  |
| Stage1&2  | Linear estimates  | 7,156 | 1228      | 0.89 | 0.83 | 0.95 | 974    | 0.92 | 0.86 | 0.99 | 832       | 0.91 | 0.84 | 0.99 | 660    | 0.95 | 0.87 | 1.04 |
|           | 0                 | 1,941 | 358       | 1.00 | Ref  |      | 268    | 1.00 | Ref  |      | 235       | 1.00 | Ref  |      | 173    | 1.00 | Ref  |      |
|           | <=7               | 3,381 | 604       | 0.95 | 0.83 | 1.08 | 489    | 1.02 | 0.88 | 1.18 | 418       | 0.96 | 0.82 | 1.13 | 346    | 1.06 | 0.88 | 1.28 |
|           | >7-<=14           | 1,267 | 181       | 0.73 | 0.61 | 0.87 | 144    | 0.77 | 0.63 | 0.95 | 122       | 0.76 | 0.61 | 0.95 | 93     | 0.80 | 0.62 | 1.03 |
|           | 14+               | 567   | 85        | 0.77 | 0.61 | 0.98 | 73     | 0.88 | 0.68 | 1.15 | 57        | 0.86 | 0.64 | 1.15 | 48     | 1.00 | 0.73 | 1.39 |
| All cases | Linear estimates  | 8,446 | 1,506     | 0.88 | 0.83 | 0.93 | 1,213  | 0.90 | 0.84 | 0.96 | 945       | 0.90 | 0.83 | 0.98 | 765    | 0.93 | 0.85 | 1.01 |
|           | 0                 | 2,329 | 456       | 1.00 | Ref  |      | 353    | 1.00 | Ref  |      | 277       | 1.00 | Ref  |      | 212    | 1.00 | Ref  |      |
|           | <=7               | 3,996 | 726       | 0.89 | 0.80 | 1.01 | 596    | 0.94 | 0.83 | 1.08 | 469       | 0.95 | 0.82 | 1.11 | 394    | 1.04 | 0.88 | 1.23 |
|           | >7-<=14           | 1,454 | 221       | 0.71 | 0.61 | 0.84 | 177    | 0.74 | 0.61 | 0.88 | 139       | 0.78 | 0.63 | 0.96 | 109    | 0.81 | 0.64 | 1.03 |
|           | 14+               | 667   | 103       | 0.74 | 0.60 | 0.92 | 87     | 0.81 | 0.64 | 1.02 | 60        | 0.77 | 0.58 | 1.03 | 50     | 0.86 | 0.63 | 1.18 |

**S Figure :Cut-off points for categories of alcohol consumption by study included in the meta-analysis**

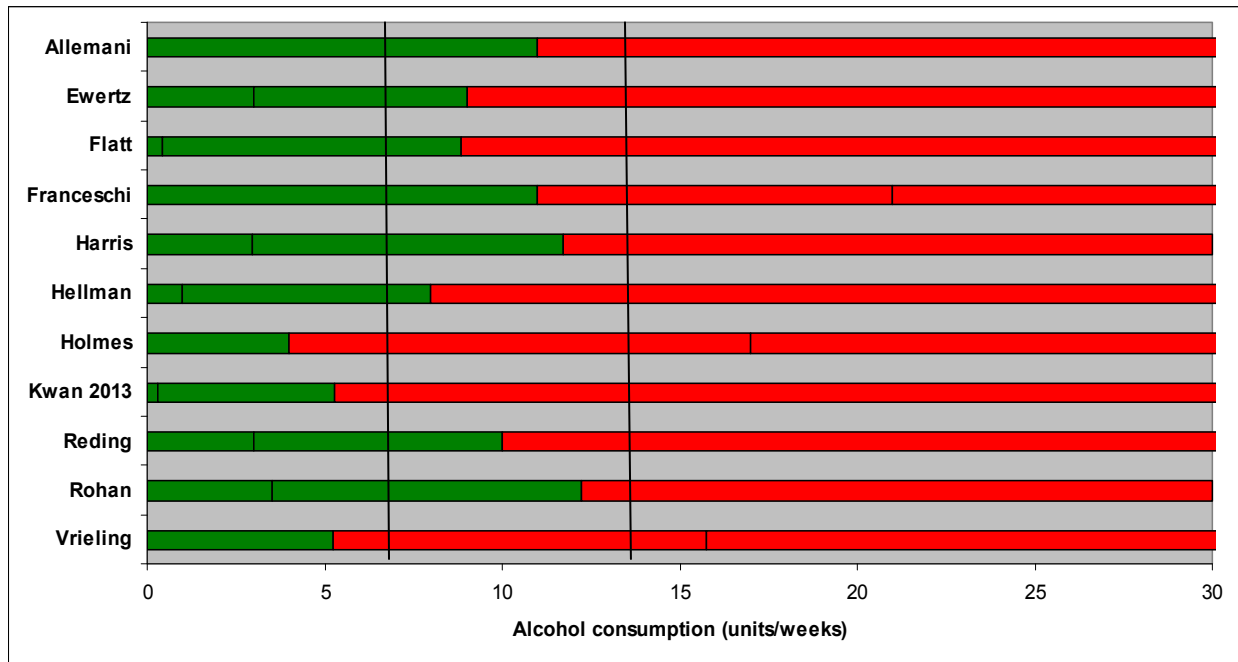

Green = alcohol consumption category defined as moderate for the purpose of the meta-analysis in which “moderate drinkers” were compared to non-drinkers.



## Reference List

- (1) Dite GS, Jenkins MA, Southey MC, Hocking JS, Giles GG, McCredie MR et al. Familial risks, early-onset breast cancer, and BRCA1 and BRCA2 germline mutations. *J Natl Cancer Inst* 2003;95(6):448-457.
- (2) Cruz GI, Martinez ME, Natarajan L, Wertheim BC, Gago-Dominguez M, Bondy M et al. Hypothesized role of pregnancy hormones on HER2+ breast tumor development. *Breast Cancer Res Treat* 2013;137(1):237-246.
- (3) Redondo CM, Gago-Dominguez M, Ponte SM, Castelo ME, Jiang X, Garcia AA et al. Breast feeding, parity and breast cancer subtypes in a Spanish cohort. *PLoS One* 2012;7(7):e40543.
- (4) Bojesen SE, Tybjaerg-Hansen A, Axelsson CK, Nordestgaard BG. No association of breast cancer risk with integrin beta3 (ITGB3) Leu33Pro genotype. *Br J Cancer* 2005;93(1):167-171.
- (5) Weischer M, Bojesen SE, Tybjaerg-Hansen A, Axelsson CK, Nordestgaard BG. Increased risk of breast cancer associated with CHEK2\*1100delC. *J Clin Oncol* 2007;25(1):57-63.
- (6) Chang-Claude J, Eby N, Kiechle M, Bastert G, Becher H. Breastfeeding and breast cancer risk by age 50 among women in Germany. *Cancer Causes Control* 2000;11(8):687-695.
- (7) Fagerholm R, Hofstetter B, Tommiska J, Aaltonen K, Vrtel R, Syrjakoski K et al. NAD(P)H:quinone oxidoreductase 1 NQO1\*2 genotype (P187S) is a strong prognostic and predictive factor in breast cancer. *Nat Genet* 2008;40(7):844-853.
- (8) Kilpivaara O, Bartkova J, Eerola H, Syrjakoski K, Vahteristo P, Lukas J et al. Correlation of CHEK2 protein expression and c.1100delC mutation status with tumor characteristics among unselected breast cancer patients. *Int J Cancer* 2005;113(4):575-580.
- (9) Syrjakoski K, Vahteristo P, Eerola H, Tamminen A, Kivinummi K, Sarantaus L et al. Population-based study of BRCA1 and BRCA2 mutations in 1035 unselected Finnish breast cancer patients. *J Natl Cancer Inst* 2000;92(18):1529-1531.
- (10) Kawase T, Matsuo K, Suzuki T, Hiraki A, Watanabe M, Iwata H et al. FGFR2 intronic polymorphisms interact with reproductive risk factors of breast cancer: results of a case control study in Japan. *Int J Cancer* 2009;125(8):1946-1952.
- (11) John EM, Hopper JL, Beck JC, Knight JA, Neuhausen SL, Senie RT et al. The Breast Cancer Family Registry: an infrastructure for cooperative multinational, interdisciplinary and translational studies of the genetic epidemiology of breast cancer. *Breast Cancer Res* 2004;6(4):R375-R389.

- (12) Garcia-Closas M, Egan KM, Newcomb PA, Brinton LA, Titus-Ernstoff L, Chanock S et al. Polymorphisms in DNA double-strand break repair genes and risk of breast cancer: two population-based studies in USA and Poland, and meta-analyses. *Hum Genet* 2006;119(4):376-388.
- (13) Anton-Culver H, Cohen PF, Gildea ME, Ziogas A. Characteristics of BRCA1 mutations in a population-based case series of breast and ovarian cancer. *Eur J Cancer* 2000;36(10):1200-1208.
- (14) Ziogas A, Gildea M, Cohen P, Bringman D, Taylor TH, Seminara D et al. Cancer risk estimates for family members of a population-based family registry for breast and ovarian cancer. *Cancer Epidemiol Biomarkers Prev* 2000;9(1):103-111.
